# Supplementary material
Source: PubMed Central journal article supplement (PMC2913669)
Supplement: btq059_1.pdf [file btq059_1.pdf]

# Supplementary Material of GO-Bayes: Gene Ontology-based over-representation analysis using a Bayesian approach

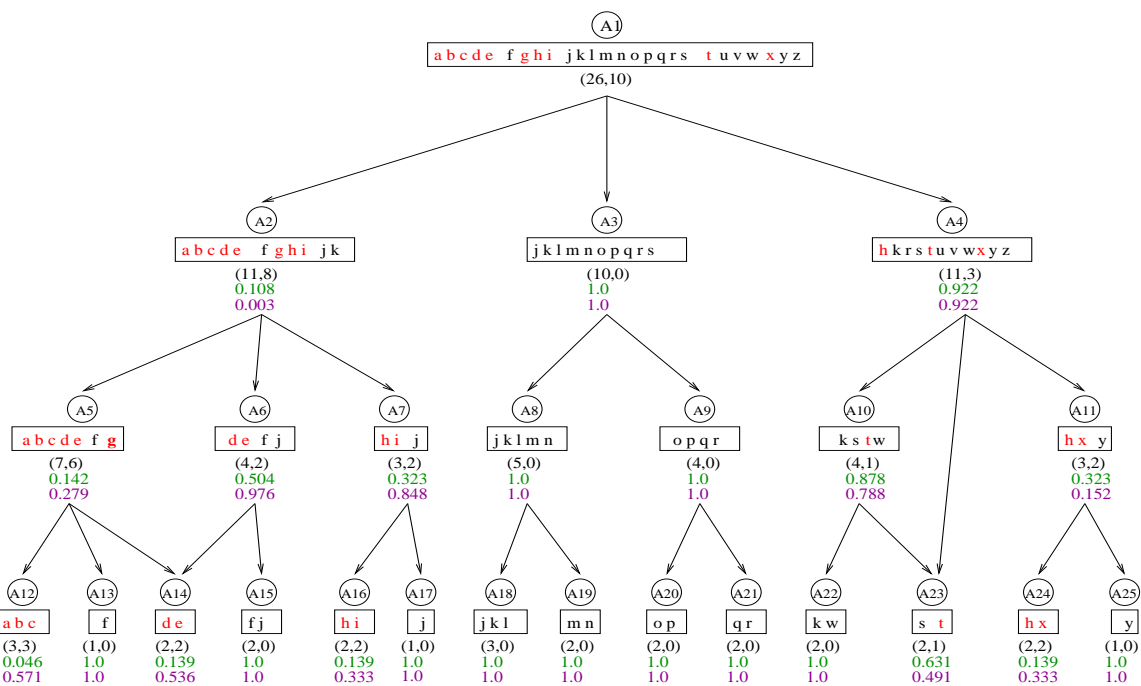

Figure 3: Comparison of the *elim*  $P$ -value (Alexa *et al.*, 2006) and the parent-child (union)  $P$ -value (Grossmann *et al.*, 2007) with the artificial DAG. For illustrative purpose, we set the  $P$ -value cut off at 0.05 for the *elim* method. Thus  $A_{12}$  is considered significantly over-represented and genes ( $a, b, c$ ) are removed from its ancestor terms  $A_5$  and  $A_2$ . The Bonferroni adjustment was not conducted because we are interested in the ranks of the terms. The *elim*  $P$ -values are listed in green and the parent-child  $P$ -values are listed in purple.

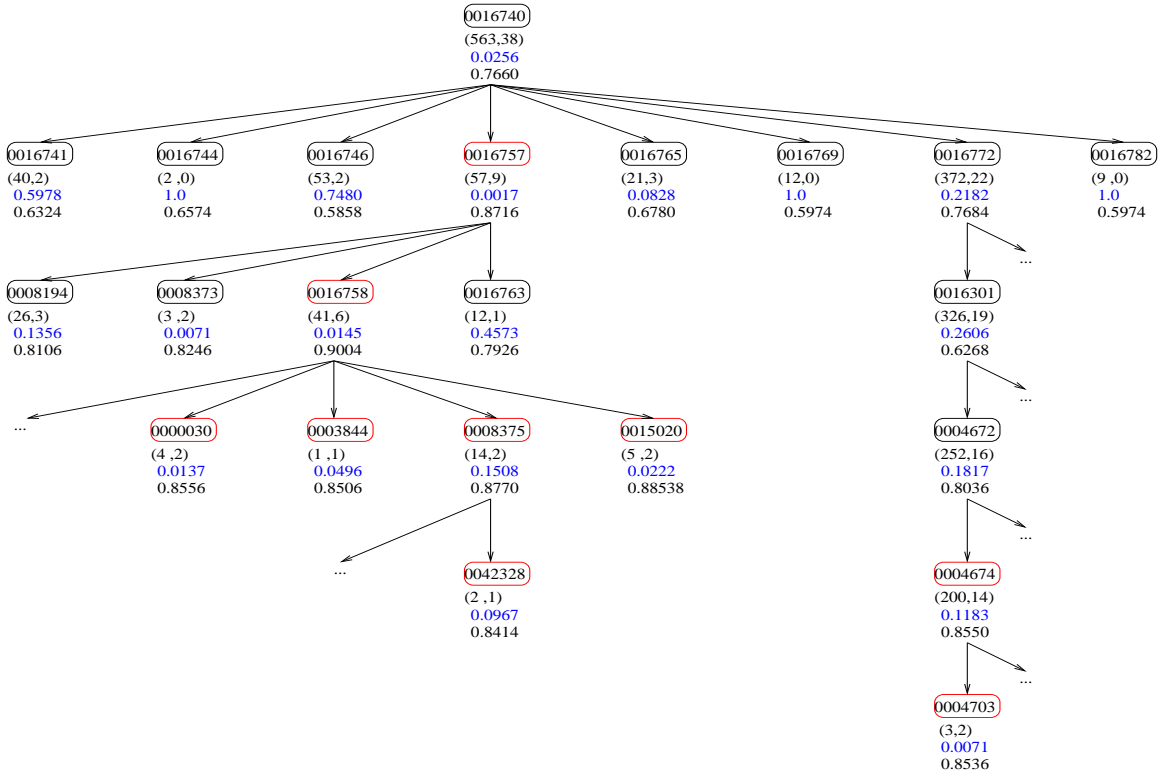

Figure 4: The regional DAG of GO:0016758. The rectangles in the DAG denote the GO terms in the neighborhood of GO:0016758. The rectangles in red denote the GO terms that are ranked top 20 by the GO-Bayes approach. In the DAG,  $(I_A, n_A)$  are listed under each rectangle. The hypergeometric  $P$ -values are listed in blue, the  $B$ -scores are listed in black underneath the  $P$ -values. The names of the GO terms are listed in Table 2.

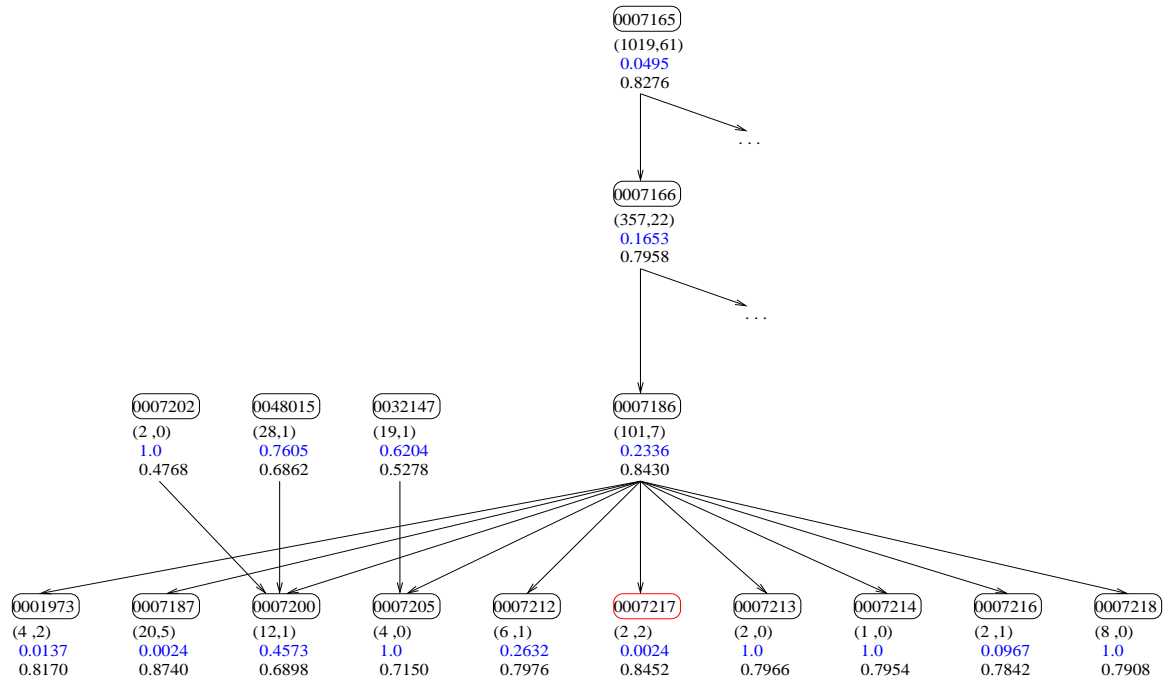

Figure 5: The regional DAG of GO:0007217. The rectangles in the DAG denote the GO terms in the neighborhood of GO:0007217, and  $(I_A, n_A)$  are listed under each rectangle. The hypergeometric  $P$ -values are listed in blue, the  $B$ -scores are listed in black underneath the  $P$ -values. The names of the GO terms are listed in Table 2.

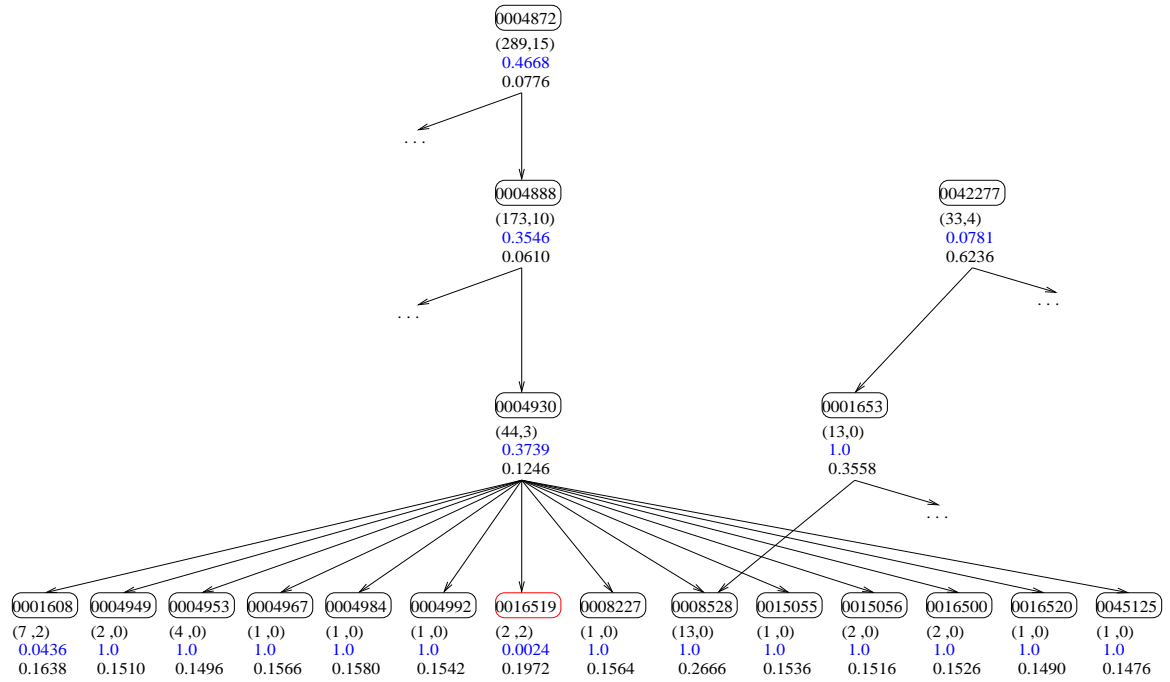

Figure 6: The regional DAG of GO:0016519. The rectangles in the DAG denote the GO terms in the neighborhood of GO:0016519, and  $(I_A, n_A)$  are listed under each rectangle. The hypergeometric  $P$ -values are listed in blue, the  $B$ -scores are listed in black underneath the  $P$ -values. The names of the GO terms are listed in Table 2.

Table 2: The names of GO terms in Figure 1-3.

| GO ID      | GO name                                                                           |
|------------|-----------------------------------------------------------------------------------|
| GO:0000030 | mannosyltransferase activity                                                      |
| GO:0001608 | nucleotide receptor activity, G-protein coupled                                   |
| GO:0001653 | peptide receptor activity                                                         |
| GO:0001973 | adenosine receptor signaling pathway                                              |
| GO:0003844 | 1,4-alpha-glucan branching enzyme activity                                        |
| GO:0004872 | receptor activity                                                                 |
| GO:0004888 | transmembrane receptor activity                                                   |
| GO:0004930 | G-protein coupled receptor activity                                               |
| GO:0004949 | cannabinoid receptor activity                                                     |
| GO:0004953 | icosanoid receptor activity                                                       |
| GO:0004967 | glucagon receptor activity                                                        |
| GO:0004984 | olfactory receptor activity                                                       |
| GO:0004992 | platelet activating factor receptor activity                                      |
| GO:0007165 | signal transduction                                                               |
| GO:0007166 | cell surface receptor linked signal transduction                                  |
| GO:0007186 | G-protein coupled receptor protein signaling pathway                              |
| GO:0007187 | G-protein signaling, coupled to cyclic nucleotide second messenger                |
| GO:0007200 | G-protein signaling, coupled to IP3 second messenger (phospholipase C activating) |
| GO:0007202 | activation of phospholipase C activity                                            |
| GO:0007205 | activation of protein kinase C activity                                           |
| GO:0007212 | dopamine receptor signaling pathway                                               |
| GO:0007213 | acetylcholine receptor signaling, muscarinic pathway                              |
| GO:0007214 | gamma-aminobutyric acid signaling pathway                                         |
| GO:0007216 | metabotropic glutamate receptor signaling pathway                                 |
| GO:0007217 | tachykinin signaling pathway                                                      |
| GO:0007218 | neuropeptide signaling pathway                                                    |
| GO:0008194 | UDP-glycosyltransferase activity                                                  |
| GO:0008227 | amine receptor activity                                                           |
| GO:0008373 | sialyltransferase activity                                                        |
| GO:0008375 | acetylglucosaminyltransferase activity                                            |
| GO:0008528 | peptide receptor activity, G-protein coupled                                      |
| GO:0015020 | glucuronosyltransferase activity                                                  |
| GO:0015055 | secretin receptor activity                                                        |
| GO:0015056 | corticotrophin-releasing factor receptor activity                                 |
| GO:0016500 | protein-hormone receptor activity                                                 |
| GO:0016519 | gastric inhibitory peptide receptor activity                                      |
| GO:0016520 | growth hormone-releasing hormone receptor activity                                |
| GO:0016740 | transferase activity                                                              |
| GO:0016741 | transferase activity, transferring one-carbon groups                              |
| GO:0016744 | transferase activity, transferring aldehyde or ketonic groups                     |
| GO:0016746 | transferase activity, transferring acyl groups                                    |
| GO:0016757 | transferase activity, transferring glycosyl groups                                |
| GO:0016758 | transferase activity, transferring hexosyl groups                                 |
| GO:0016763 | transferase activity, transferring pentosyl groups                                |
| GO:0016765 | transferase activity, transferring alkyl or aryl (other than methyl) groups       |
| GO:0016769 | transferase activity, transferring nitrogenous groups                             |
| GO:0016772 | transferase activity, transferring phosphorus-containing groups                   |
| GO:0016782 | transferase activity, transferring sulfur-containing groups                       |
| GO:0032147 | activation of protein kinase activity                                             |
| GO:0042277 | peptide binding                                                                   |
| GO:0042328 | heparan sulfate N-acetylglucosaminyltransferase activity                          |
| GO:0045125 | bioactive lipid receptor activity                                                 |
| GO:0048015 | phosphoinositide-mediated signaling                                               |
